# Supplementary material
Source: PubMed Central journal article supplement (PMC8030996)
Supplement: JCH-20-315-s001.pdf [file JCH-20-315-s001.pdf]

**Supplementary Table S1.** Blood pressure levels at three measurement times for each seven-day period, and the difference in blood pressure between periods (excluding regular drinkers)

| Variable                       | Days 1–7     | Days 8–14    | Difference | <i>p</i> -value |
|--------------------------------|--------------|--------------|------------|-----------------|
| Morning SBP, mmHg (n=39)       | 132.1 ± 12.9 | 130.3 ± 11.6 | 1.7 ± 4.5  | 0.021           |
| Morning DBP, mmHg (n=39)       | 76.7 ± 8.4   | 75.8 ± 8.7   | 0.9 ± 3.0  | 0.078           |
| Morning HR, bpm (n=39)         | 64.1 ± 10.4  | 64.2 ± 10.5  | −0.1 ± 3.7 | 0.874           |
| Before-dinner SBP, mmHg (n=38) | 131.1 ± 14.5 | 127.2 ± 13.9 | 3.9 ± 6.8  | 0.001           |
| Before-dinner DBP, mmHg (n=38) | 76.3 ± 10.1  | 74.4 ± 9.8   | 1.9 ± 3.3  | 0.001           |
| Before-dinner HR, bpm (n=38)   | 69.1 ± 10.7  | 69.9 ± 9.7   | −0.9 ± 3.6 | 0.146           |
| At-bedtime SBP, mmHg (n=36)    | 122.2 ± 14.3 | 121.1 ± 13.1 | 1.1 ± 6.9  | 0.339           |
| At-bedtime DBP, mmHg (n=36)    | 70.9 ± 9.0   | 70.4 ± 9.5   | 0.5 ± 3.6  | 0.409           |
| At-bedtime HR, bpm (n=36)      | 67.5 ± 10.1  | 68.3 ± 9.5   | −0.7 ± 4.5 | 0.338           |

Values are the mean ± SD.

DBP; diastolic blood pressure; HR, heart rate; SBP, systolic blood pressure.

**Supplementary Table S2.** Reliability of home blood pressure measurement in each period (excluding regular drinkers)

| Variable<br>(Days 1–7 vs. Days 8–14) | n  | ICC (1,1)                 |                | Bland-Altman analysis |          |                                      |          | LOA (mmHg)   | Random error<br>MDC (mmHg) | Repeatability<br>coefficient | % of near<br>maximal variability |
|--------------------------------------|----|---------------------------|----------------|-----------------------|----------|--------------------------------------|----------|--------------|----------------------------|------------------------------|----------------------------------|
|                                      |    | Intraclass<br>correlation | 95% CI         | Fixed bias            |          | Proportional bias                    |          |              |                            |                              |                                  |
|                                      |    |                           |                | 95% CI                | bias     | slope <sup>a</sup> ( <i>p</i> value) | bias     |              |                            |                              |                                  |
| Systolic blood pressure              |    |                           |                |                       |          |                                      |          |              |                            |                              |                                  |
| Morning                              | 39 | 0.926                     | 0.864 to 0.960 | 0.432 to 3.055        | exist    | 0.234 (0.152)                        | no-exist | –4.8 to 12.9 | –                          | 9.0                          | 18.5                             |
| Before-dinner                        | 38 | 0.854                     | 0.738 to 0.921 | 1.916 to 5.894        | exist    | 0.096 (0.565)                        | no-exist | –5.9 to 20.6 | –                          | 13.5                         | 24.5                             |
| At-bedtime                           | 36 | 0.873                     | 0.767 to 0.933 | –0.958 to 3.192       | no-exist | 0.174 (0.311)                        | no-exist | –            | 13.5                       | 13.8                         | 26.0                             |
| Diastolic blood pressure             |    |                           |                |                       |          |                                      |          |              |                            |                              |                                  |
| Morning                              | 39 | 0.934                     | 0.879 to 0.965 | –0.00003 to 1.743     | no-exist | –0.103 (0.534)                       | no-exist | –            | 5.9                        | 6.0                          | 17.9                             |
| Before-dinner                        | 38 | 0.927                     | 0.865 to 0.961 | 0.958 to 2.902        | exist    | 0.101 (0.546)                        | no-exist | –2.9 to 10.2 | –                          | 6.7                          | 17.0                             |
| At-bedtime                           | 36 | 0.926                     | 0.861 to 0.962 | –0.539 to 1.533       | no-exist | –0.127 (0.459)                       | no-exist | –            | 7.0                        | 7.1                          | 19.6                             |

<sup>a</sup>: Slope of regression line.

CI, confidence interval; ICC, intraclass correlation coefficient; LOA, limits of agreement; MDC, minimal detectable change.
