# Supplementary material
Source: PubMed Central journal article supplement (PMC8030996)

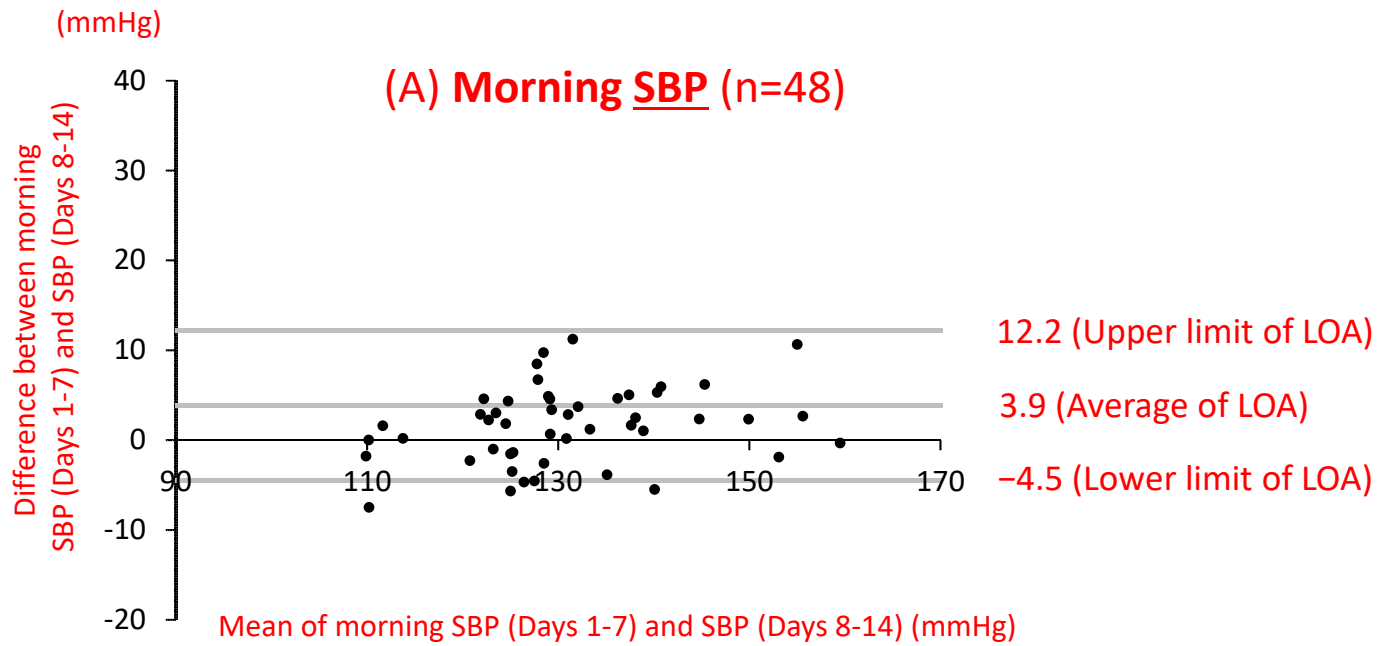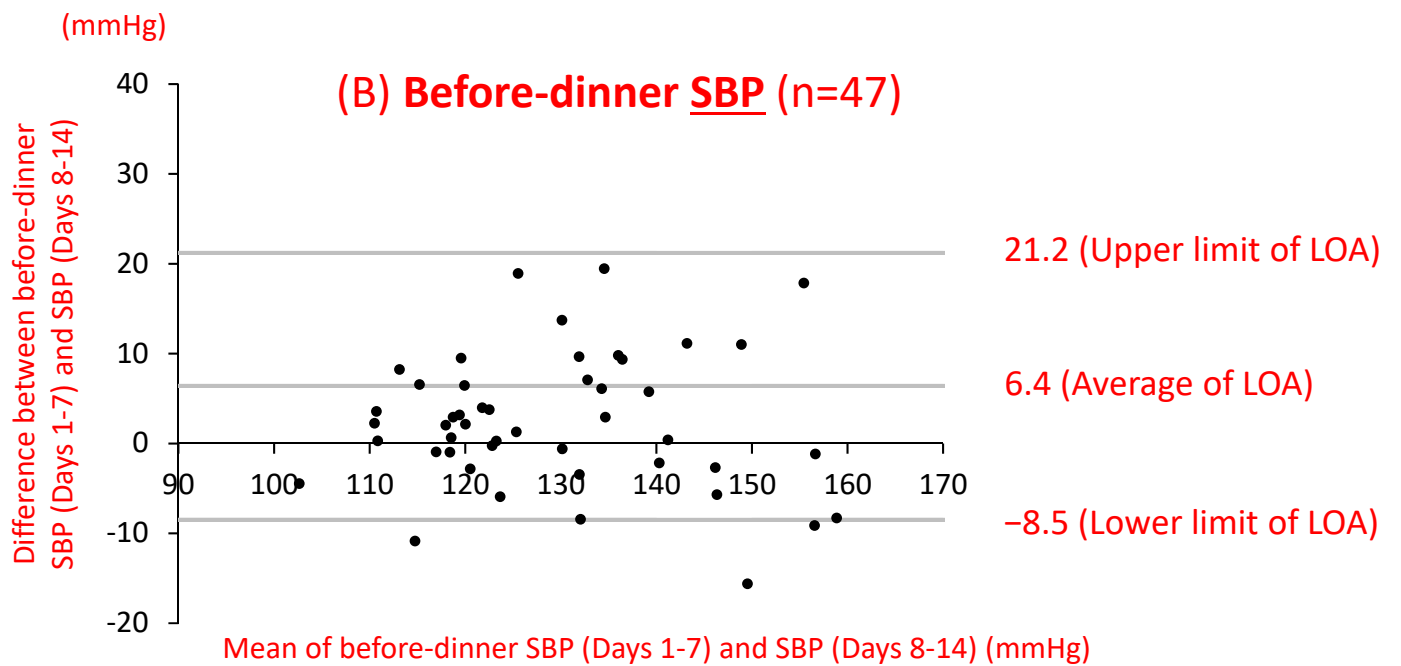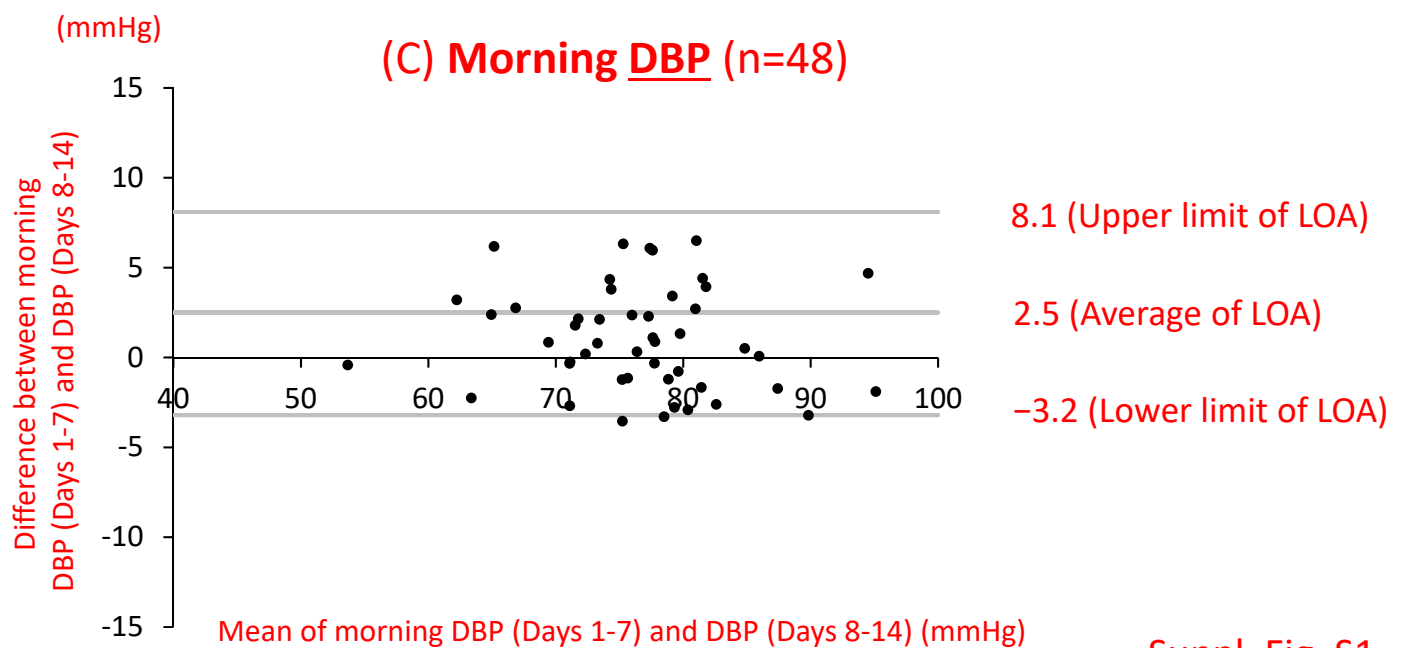

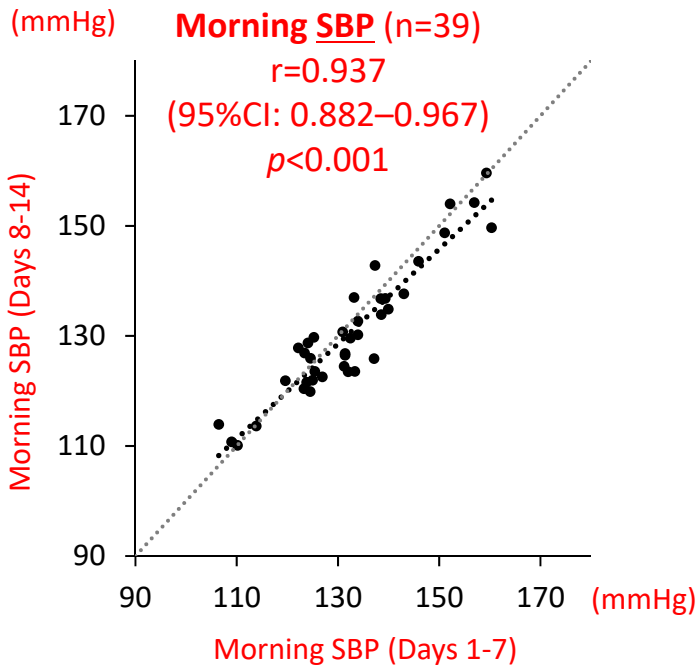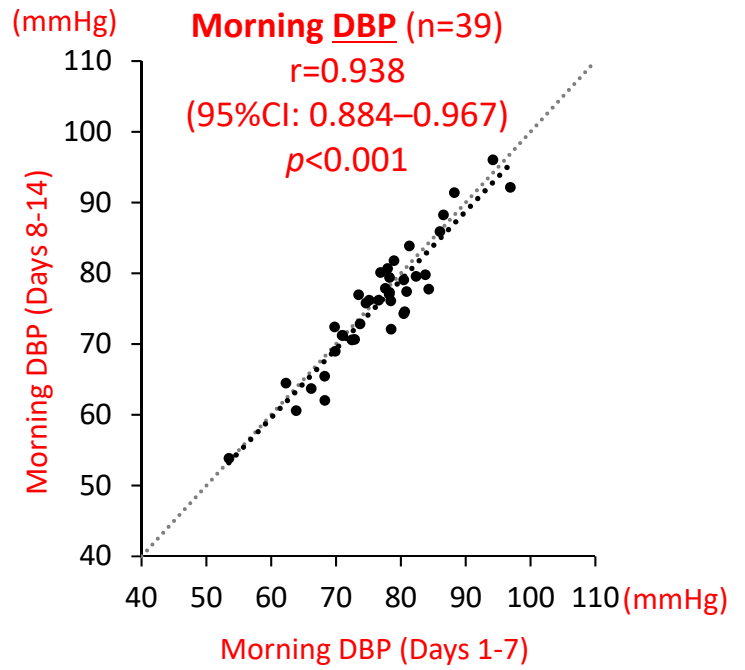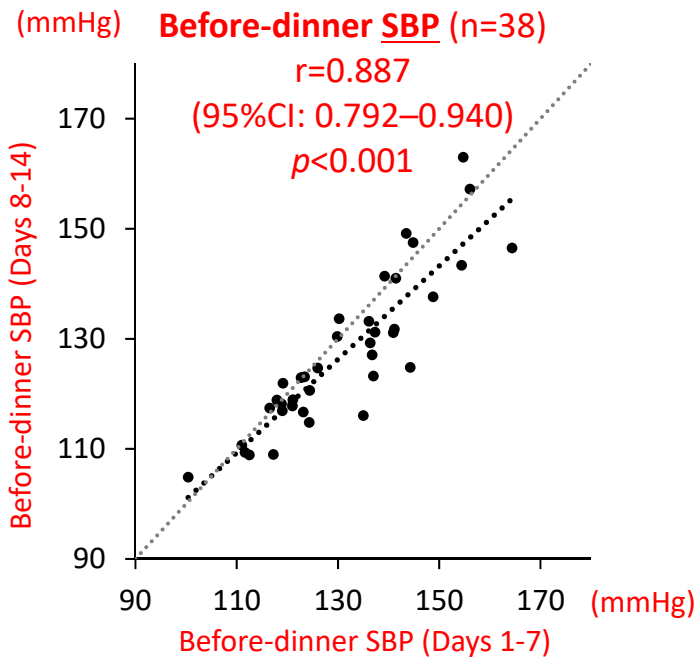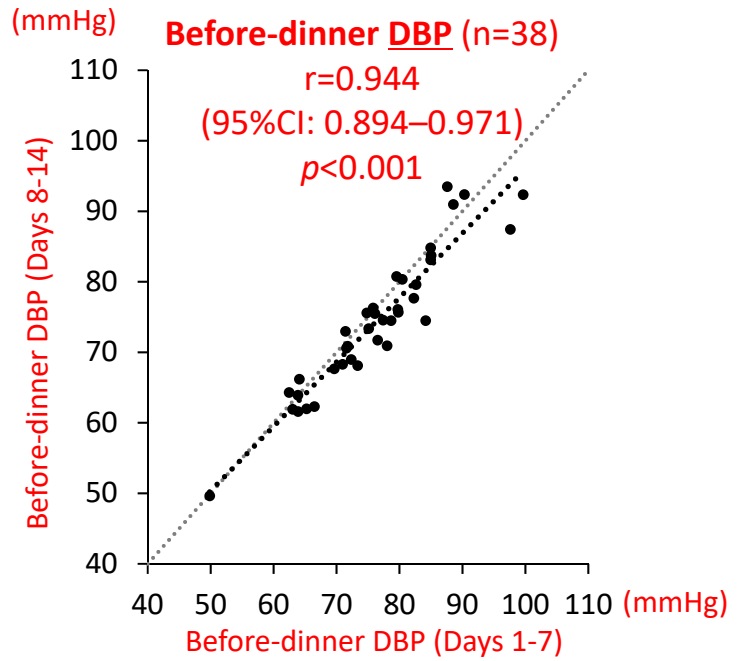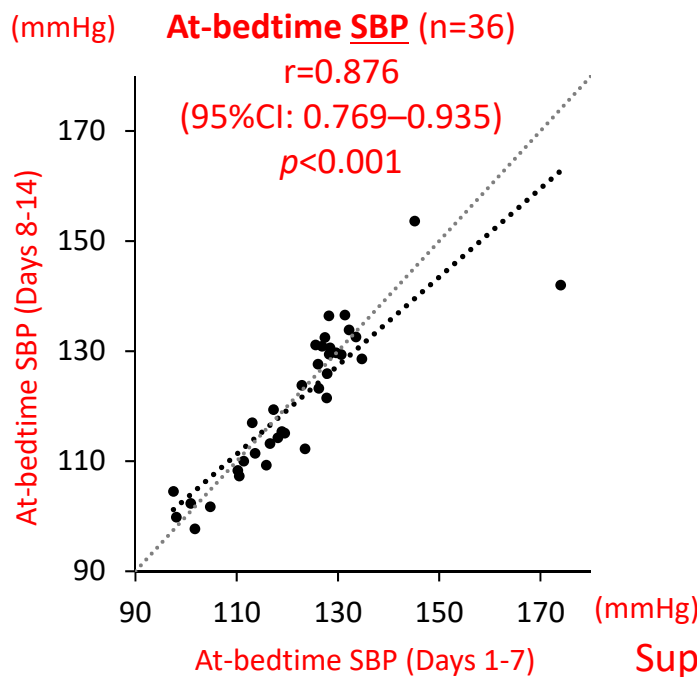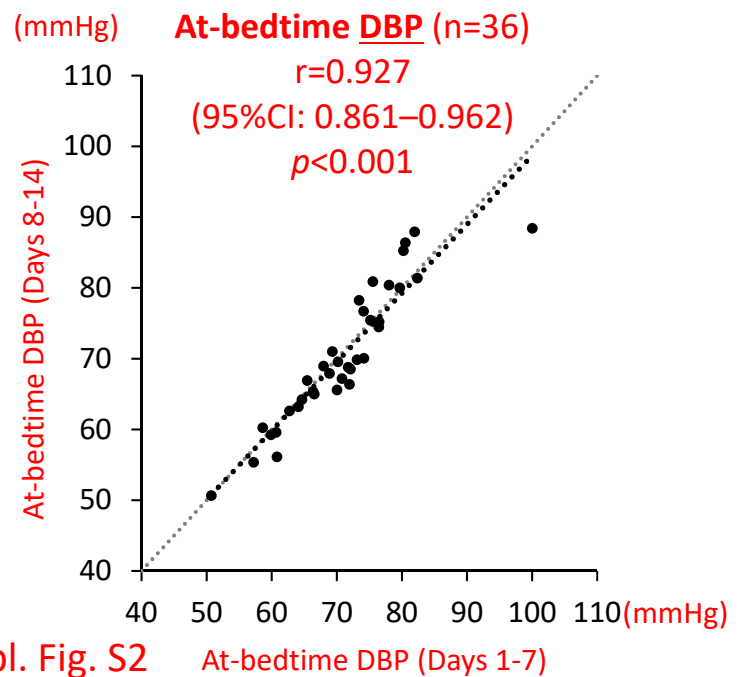

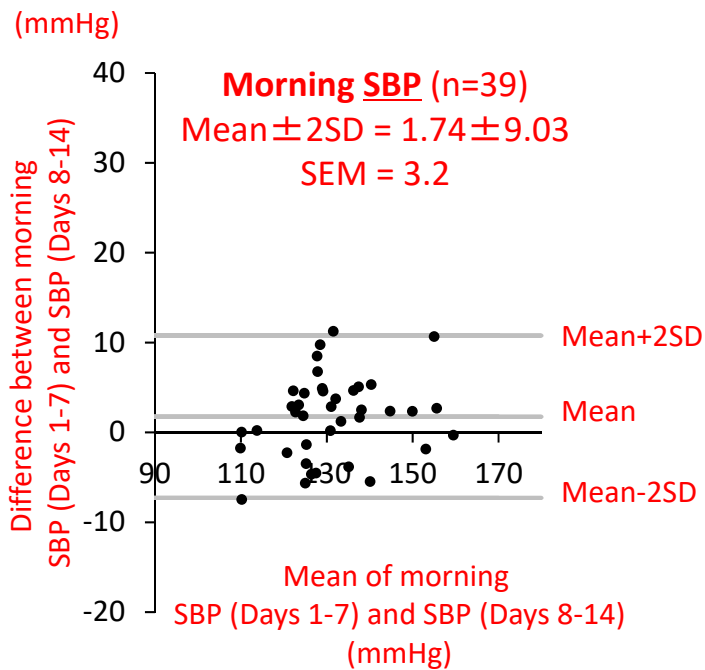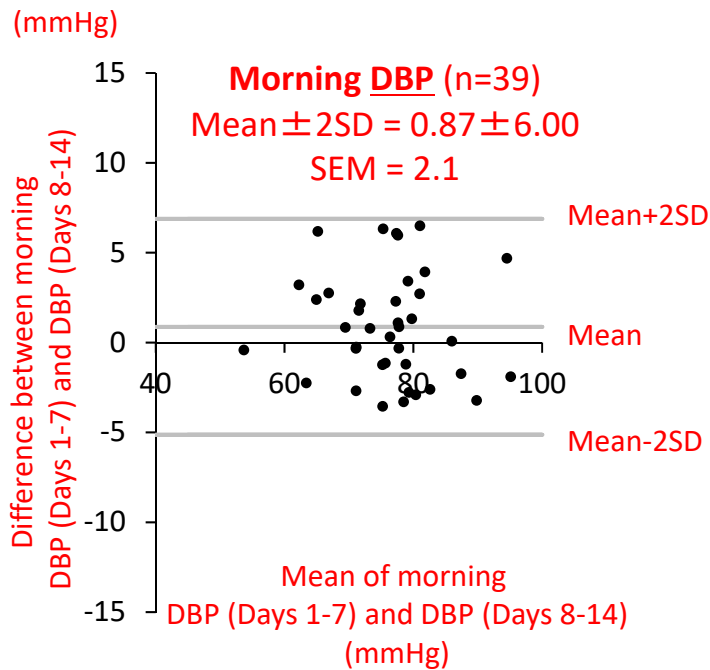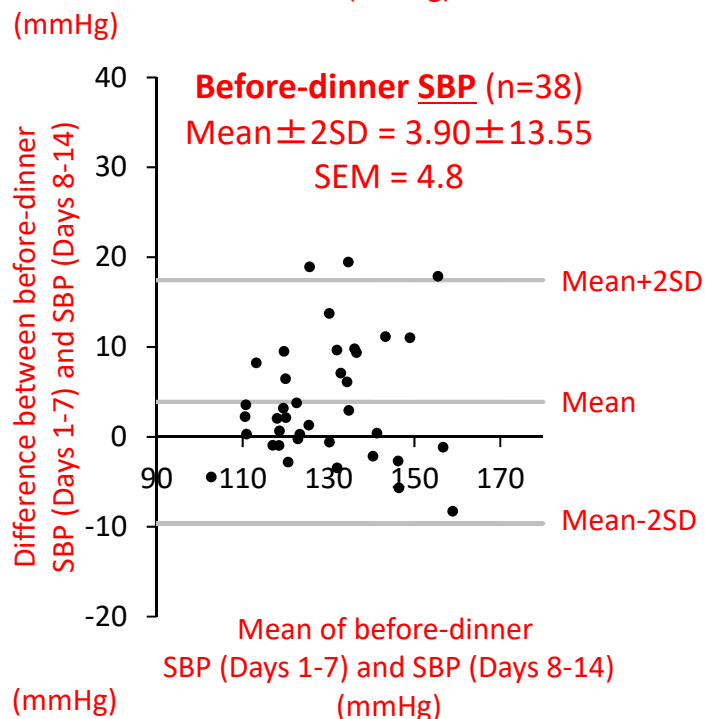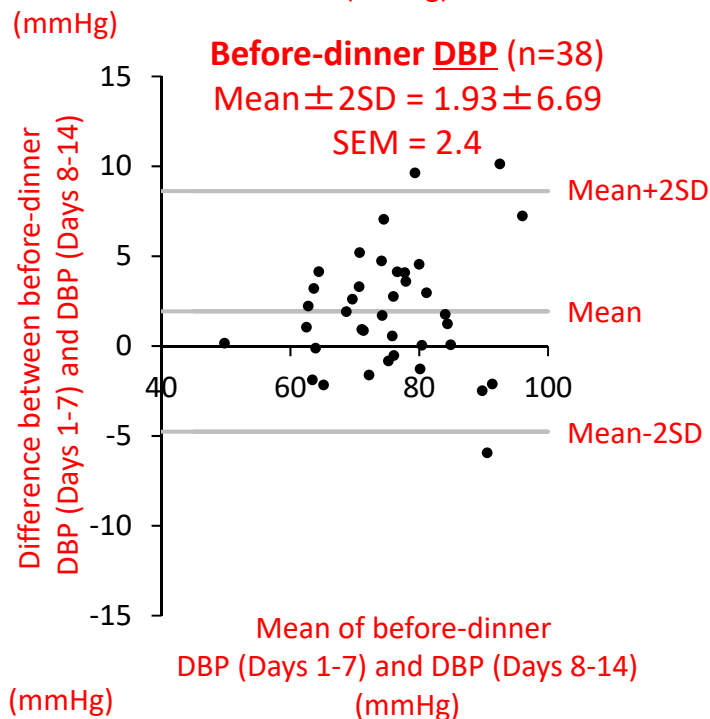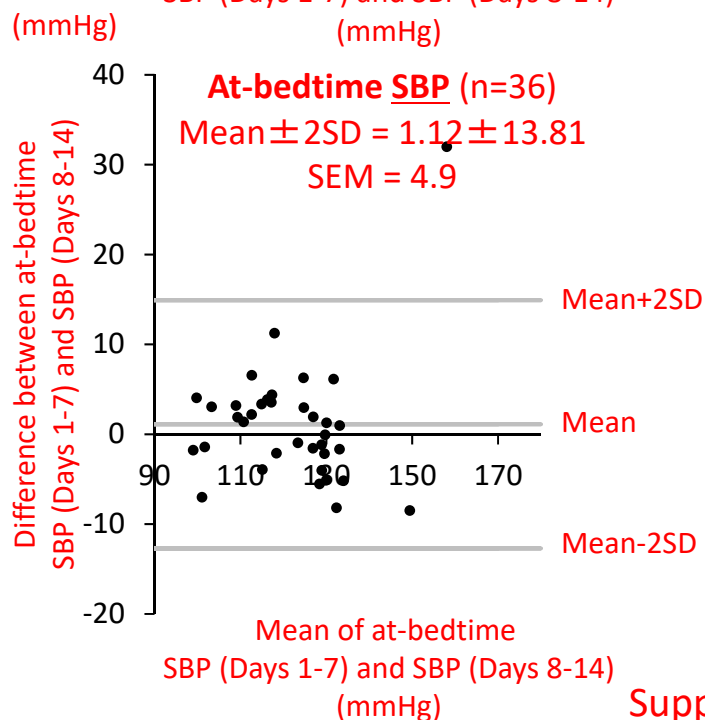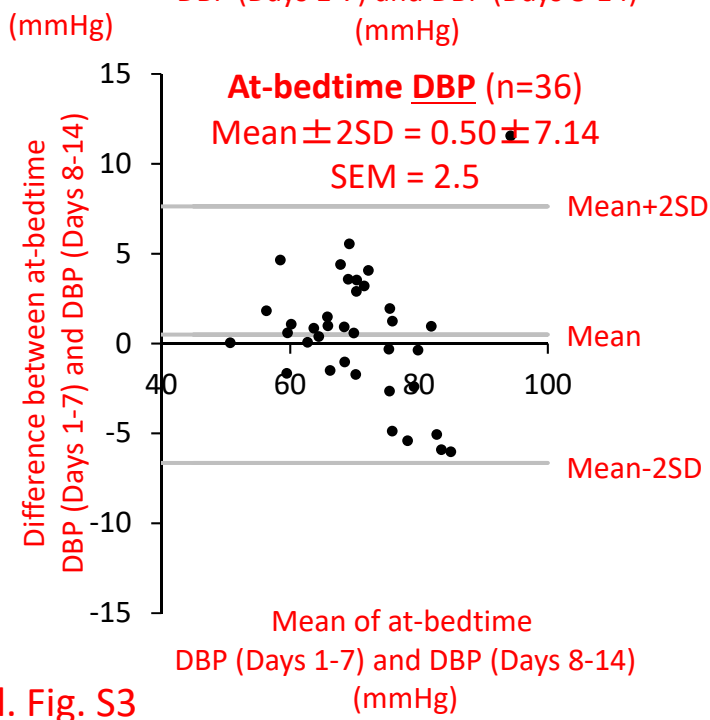

Suppl. Fig. S3

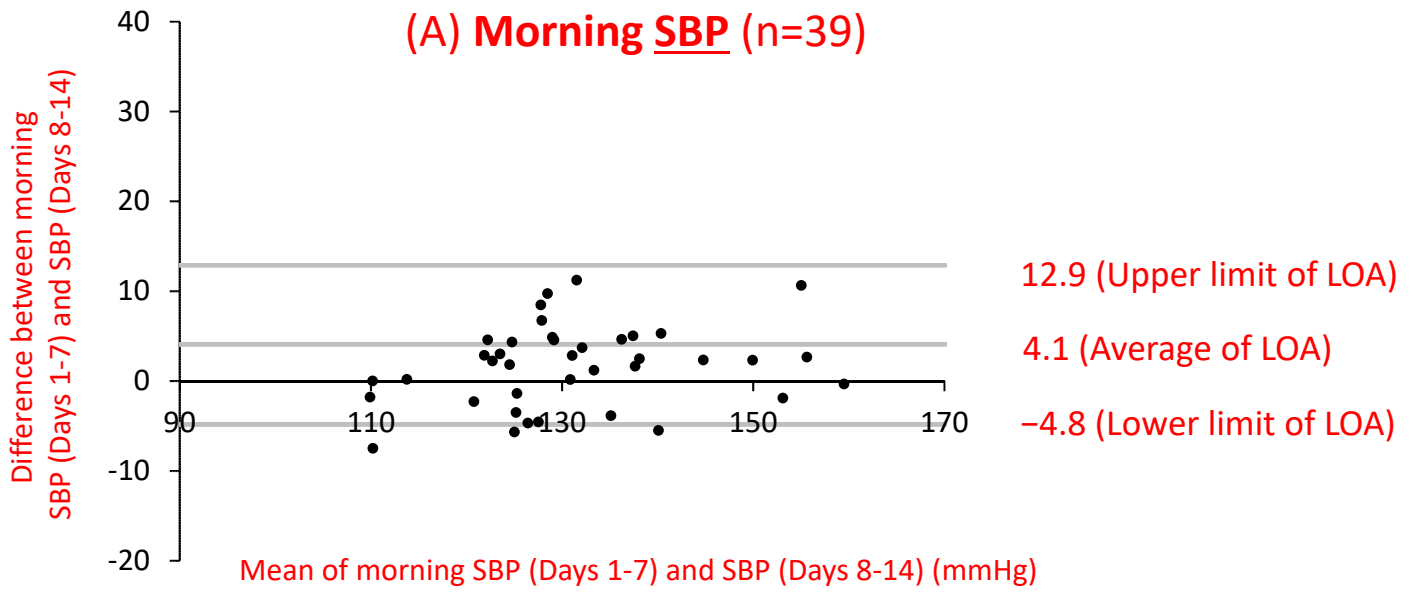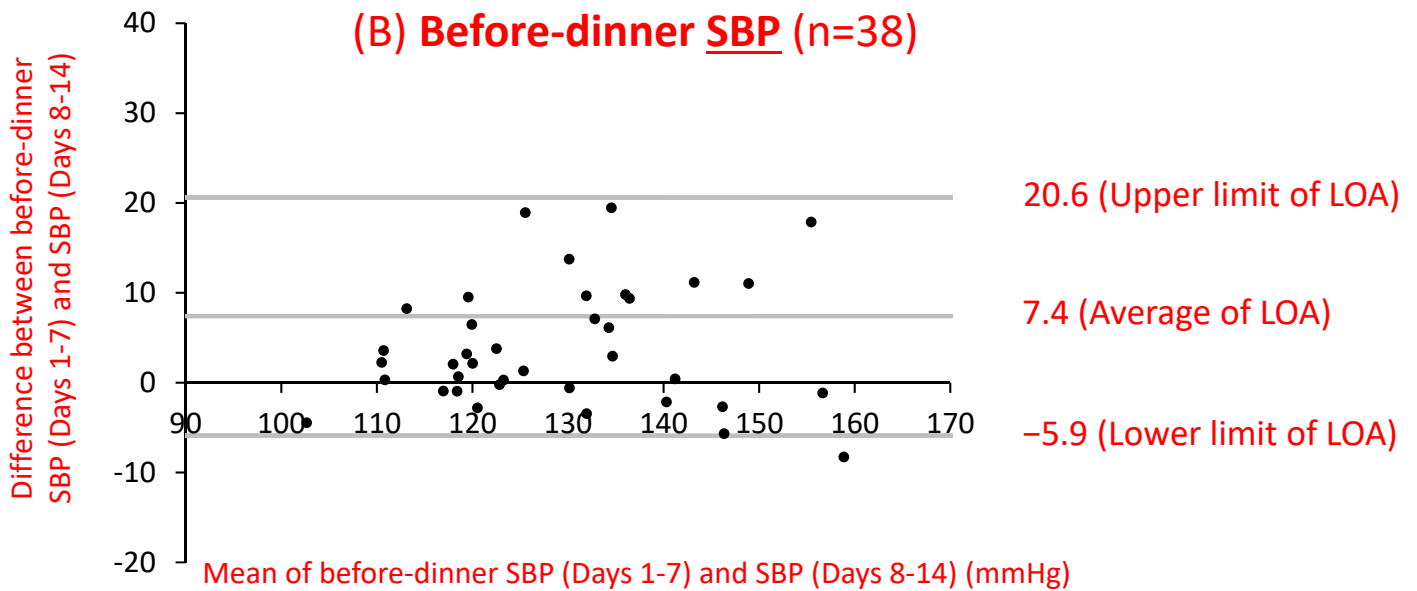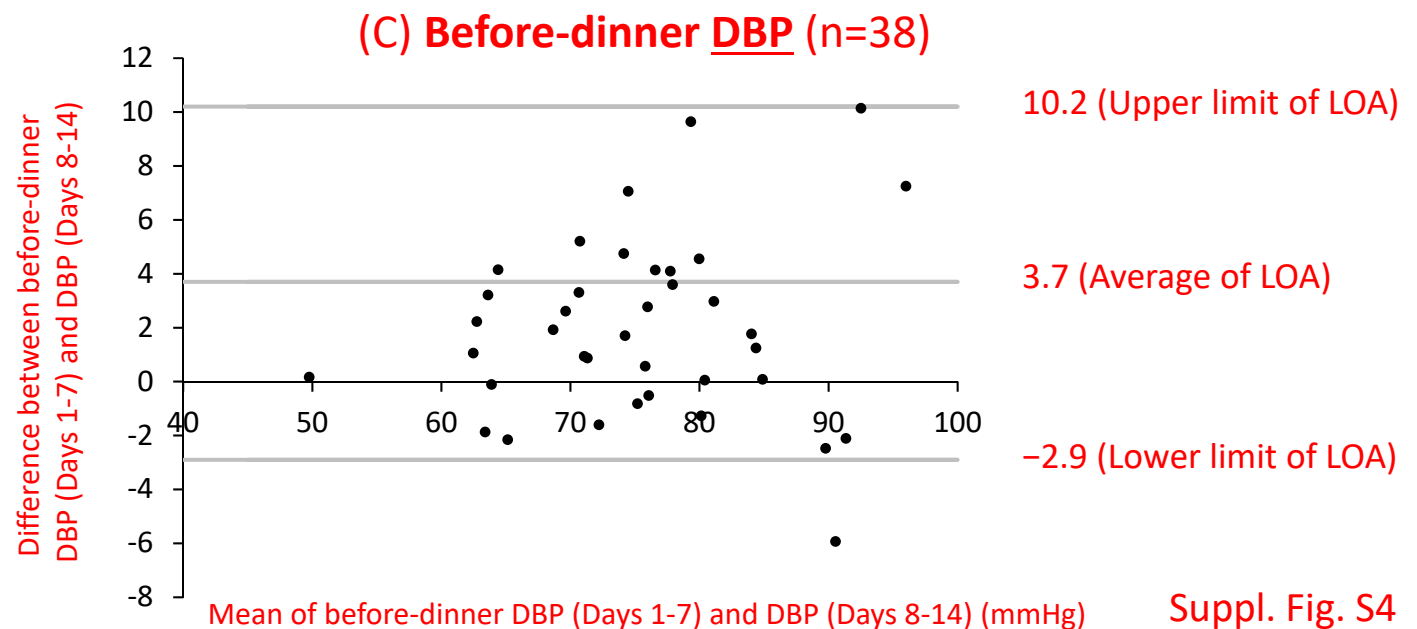

Supplement: JCH-20-315-s002.pdf [file JCH-20-315-s002.pdf]
